# Supplementary material for: Proteotranscriptomic Analysis and Toxicity Assay Suggest the Functional Distinction between Venom Gland Chambers in Twin-Spotted Assassin Bug, Platymeris biguttatus
Source: MDPI journal article supplement (doi:10.3390/biology11030464), 2022-03-17
Supplement: s1 [file s1]

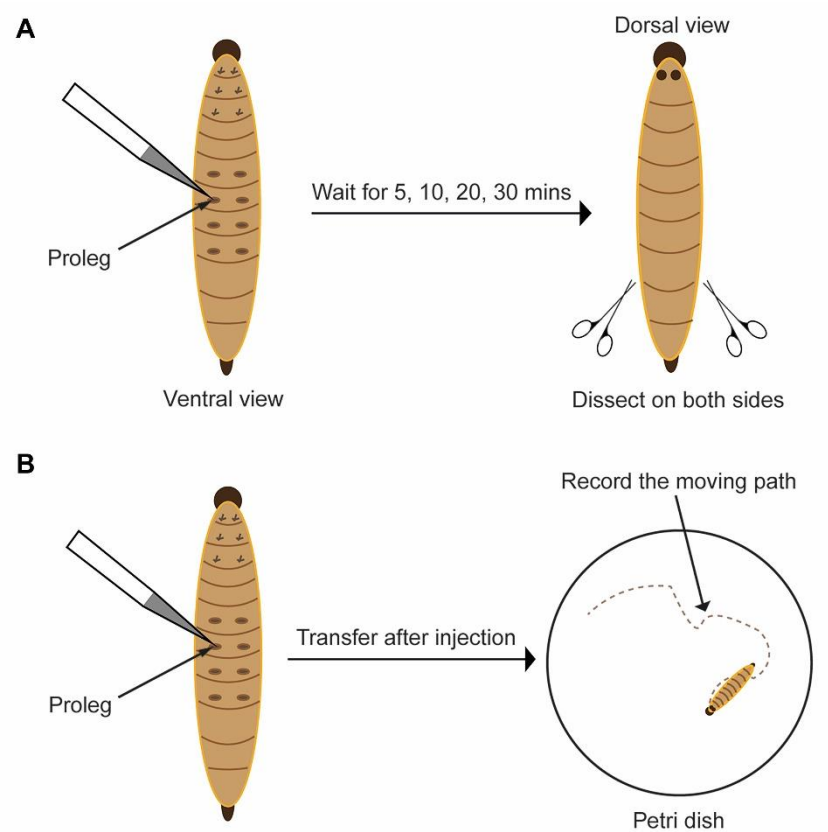

**Figure S1.** Toxicological bioassay experiments on larvae of *Galleria mellonella* using the extracts from salivary glands. **(A)** Evaluation of effects on tissue digestion by venom injection and larval dissection. **(B)** Evaluation of effects on larval mobility by venom injection and moving path record.

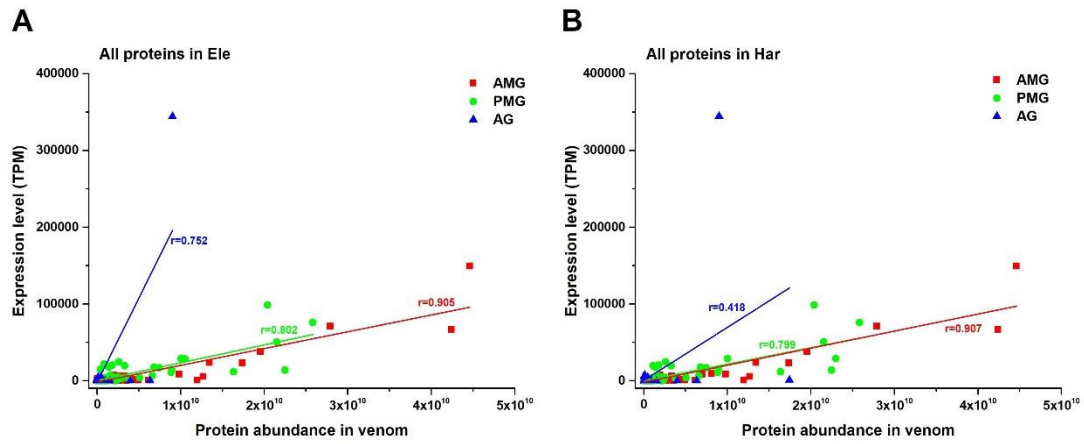

**Figure S2.** Comparison of secretory protein abundance (calculated from intensity-based absolute quantification of proteins, iBAQ value) and expression level (normalized to transcripts per million, TPM) in each gland compartment. **(A)** The identified secretory proteins from venom obtained by electrostimulation. **(B)** The identified secretory proteins from venom obtained by harassment. AG: accessory gland; AMG: anterior main gland; PMG: posterior main gland. Values  $r$  indicate Pearson correlation coefficient.
